# Supplementary material
Source: Preprints.org preprint supplement (doi:10.20944/preprints202104.0449.v2)
Supplement: Supplementary file 1 [file Table S1.xlsx]

## Sheet: K91meta
Table 1. Physicochemical properties of the water samples. If not noted otherwise, μM units are used.
Sample	Station	SITE	Latitude	Longitude	Station depth (m)	NOX	NO3	NO2	NH4	TN	DIN	TON	TP	SRP	Chlorophyll a (mg/L)	TOC	SiO2	TURB	Salinity (PSU)	Temperature (°C)	Dissolved oxygen	Kd (m-1)	TN:TP	N:P	DIN:TP	Si:DIN	Delta Sigma-T
201B	201	Sands Key	25.51	-80.165	3.35	0.03987	0.02064	0.01923	0.06336	7.00914	0.10323	6.90591	0.171362			90.1667	0.207	0.34	36.6436	22.8312	6.94701	0.364251	42.1884	8.76871	1.2249	0.184268	0.150019
201S	201	Sands Key	25.51	-80.165	3.35	0.04989	0.0358	0.01409	0.15039	6.89808	0.20028	6.6978	0.16329	0.02281	0.221525	89.25	0.037	0.32	36.6292	23.2626	6.89522	0.364251	42.1884	8.76871	1.2249	0.184268	0.150019
203B	203	Triumph Reef	25.4805	-80.1177	4.91	0.21274	0.18605	0.02669	0.10362	5.38758	0.31636	5.07122	0.171022	0.03553		75.8583		0.08	36.4146	23.5476	6.86952	0.110238	31.8036	9.33854	0.824975	0.0506731	0.153286
203S	203	Triumph Reef	25.4805	-80.1177	4.91	0.15747	0.13457	0.0229		6.07064	0.15747	5.91317	0.190625	0.01684	0.312741	78.2167	0.008	0.2	36.3972	23.9709	6.81992	0.110238	31.8036	9.33854	0.824975	0.0506731	0.153286
206B	206	Ajax Reef	25.415	-80.143	4.91	0.17379	0.15868	0.01511	0.09353	5.48754	0.26732	5.22022	0.160525			72.9	0.042	0.14	36.4646	23.3256	6.89418	0.19503	44.4363		1.51991		0.448497
206S	206	Ajax Reef	25.415	-80.143	4.91	0.14585	0.1251	0.02075	0.10643	7.37566	0.25228	7.12338	0.165763		0.338802	72.825	-0.001	0.09	36.4506	24.6363	6.74022	0.19503	44.4363		1.51991		0.448497
214B	214	Port Elizabeth	25.2462	-80.2992	3.415	0.1817	0.1431	0.0386	0.51677	8.18089	0.69847	7.48242	0.180087	0.04646		113.75	1.103	0.85	35.7521	22.9766	6.96507	0.520834	46.139	18.9537	1.07147	5.4294	0.01826
214S	214	Port Elizabeth	25.2462	-80.2992	3.415	0.08953	0.05131	0.03822	0.11696	8.89171	0.20649	8.68522	0.19246	0.01088	0.286679	116.667	1.124	0.73	35.7375	22.9993	6.96287	0.520834	46.139	18.9537	1.07147	5.4294	0.01826
215B	215	Carysfort Channel	25.2367	-80.289	4.074	1.02385	1.00758	0.01627	0.06539	7.91989	1.08924	6.83065	0.167203			107.75	0.877	0.47	36.0238	22.7529	6.98159	0.477575	44.1303		0.958094	5.5758	0.00154934
215S	215	Carysfort Channel	25.2367	-80.289	4.074	0.01197		0.01802	0.15672	7.76995	0.16869	7.60126	0.175835		0.286679	102	0.943	0.83	36.0244	22.7592	6.9808	0.477575	44.1303		0.958094	5.5758	0.00154934
222B	222	Dixie Shoal	25.0724	-80.3128	26.975	0.02792	0.02034	0.00758	0.04387	5.54307	0.07179	5.47128	0.164252			72.7917	0.041		36.3828	23.7579	6.84571	0.0861881	32.0319	2.41484	0.223411	0.607387	0.0533967
222S	222	Dixie Shoal	25.0724	-80.3128	26.975	0.00101		0.00434	0.03676	5.41535	0.03777	5.37758	0.168836	0.01562	0.234555	73.05	0.023		36.3795	23.9112	6.82767	0.0861881	32.0319	2.41484	0.223411	0.607387	0.0533967
223B	223	Mosquito Bank	25.0602	-80.4231	3.789	0.00502		0.00895	0.10315	5.86516	0.10817	5.75699	0.152216			92.75	0.884	0.84	36.3372	23.2797	6.90478	0.272463	46.1714	4.94725	0.25073	21.144	0.0179472
223S	223	Mosquito Bank	25.0602	-80.4231	3.789			0.00435	0.03755	6.91474	0.03755	6.87719	0.149564	0.00758	0.195463	92.3333	0.796	0.48	36.3357	23.3314	6.8986	0.272463	46.1714	4.94725	0.25073	21.144	0.0179472
224B	224	Molasses Reef Channel	25.0308	-80.3953	4.177	0.21303	0.2004	0.01263	0.08025	5.38203	0.29328	5.08875	0.19153	0.00317		76.4833		0.71	36.4915	23.9296	6.82111	0.272009	29.0408	2.00275	0.507673		0.00151694
224S	224	Molasses Reef Channel	25.0308	-80.3953	4.177	0.00881		0.00897	0.08013	5.0877	0.08894	4.99876	0.174959	0.04435	0.29971	73.025		0.77	36.4941	23.94	6.81978	0.272009	29.0408	2.00275	0.507673		0.00151694
225B	225	Molasses Reef	25.017	-80.3674	11.503	0.15371	0.13692	0.01679	0.29046	6.20947	0.44417	5.7653	0.165119	0.01866		76.1167		0.09	36.3927	23.8836	6.83042	0.017162	29.5727	8.76632	1.77449		0.0145759
225S	225	Molasses Reef	25.017	-80.3674	11.503	0.15408	0.14155	0.01253	0.15587	5.16545	0.30995	4.8555	0.174438	0.03531	0.312741	75.025		0.36	36.3893	23.9197	6.82628	0.017162	29.5727	8.76632	1.77449		0.0145759
241S	241	Long Key	24.8025	-80.8089	2.154	0.055	0.021	0.034	0.215	12.1103	0.27	11.8403	0.203	0.088	0.182432	107.667	1.594	0.24	36.9456	26.038	6.5637	0.194727	59.5773	3.06411	1.32828	5.88856	-0.000346859
242B	242	Long Key Channel	24.7915	-80.8123	4.249	0.226	0.191	0.035	0.172	8.25485	0.398	7.85685	0.166	0.003		97.25	0.631	0.98	36.7549	25.7414	6.60357	0.153361	56.0779	33.3557	1.00469	4.30629	0.0113972
242S	242	Long Key Channel	24.7915	-80.8123	4.249	0.072	0.04	0.032	0.095	9.32131	0.167	9.15431	0.166	0.005	0.221525	98.9167	0.721	0.27	36.7484	25.7597	6.60179	0.153361	56.0779	33.3557	1.00469	4.30629	0.0113972
243B	243	Tennessee Reef	24.745	-80.7833	7.285	0.078	0.056	0.022	0.113	8.62491	0.191	8.43391	0.154	0.004		79.45	8.276	0.02	36.1962	25.6065	6.63959	0.105663	57.8658	15.3546	0.883718		0.00908879
243S	243	Tennessee Reef	24.745	-80.7833	7.285	0.042	0.019	0.023	0.081	8.05403	0.123	7.93103	0.139	0.008	0.234555	86.25			36.1876	25.614	6.63907	0.105663	57.8658	15.3546	0.883718		0.00908879
244B	244	Long Key Pass Inshore	24.7933	-80.8633	3.042	0.131	0.097	0.034	0.199	7.68966	0.33	7.35966	0.169	0.011		89.25	0.502	0.68	36.5708	25.6346	6.62237	0.193482	76.4101	58.7969	2.67258	1.19226	0.00744594
244S	244	Long Key Pass Inshore	24.7933	-80.8633	3.042	0.065	0.036	0.029	0.406	13.466	0.471	12.995	0.176	0.008	0.286679	101.583	0.563	0.07	36.5665	25.6465	6.6212	0.193482	76.4101	58.7969	2.67258	1.19226	0.00744594
254S	254	Bahia Honda Key	24.6579	-81.265	2.362	0.27	0.225	0.045	0.475	11.3098	0.745	10.5648	0.229	0.026	0.104247	128.5		0.72	36.1199	25.9277	6.60663	0.347568	49.3221	28.6158	3.24896		-0.000616802
255B	255	Bahia Honda Channel	24.6217	-81.2431	8.542	0.025		0.026	0.259	10.0055	0.284	9.72155	0.228	0.015		126.5	0.277	0.56	36.0672	23.2872	6.91463	0.185788	45.8272	58.1228	1.26906	0.291347	0.484364
255S	255	Bahia Honda Channel	24.6217	-81.2431	8.542	0.064	0.038	0.026	0.227	10.5084	0.291	10.2174	0.229	0.005	0.443049	124.5	0.085	0.38	36.0995	24.8088	6.73384	0.185788	45.8272	58.1228	1.26906	0.291347	0.484364
256B	256	Bahia Honda Offshore	24.585	-81.2341	15.617	0.048	0.017	0.031	0.193	8.71705	0.241	8.47605	0.217	0.017		100.167	0.121	0.6	36.1758	24.4779	6.76918	0.156847	45.8791		1.55186	0.364992	0.101627
256S	256	Bahia Honda Offshore	24.585	-81.2341	15.617	0.061	0.032	0.029	0.256	9.37178	0.317	9.05478	0.204		0.534265	96.25	0.116	0.6	36.2479	24.9319	6.71404	0.156847	45.8791		1.55186	0.364992	0.101627
274B	274	Boca Chica Mid	24.5214	-81.7442	9.751	0.073	0.038	0.035	0.083	14.667	0.156	14.511	0.26772	0.003		116.667	0.653	2.27	36.2615	22.5372	6.99862	0.244104	73.1392		1.85456	1.34584	0.0408368
274S	274	Boca Chica Mid	24.5214	-81.7442	9.751	0.184	0.141	0.043	0.317	19.7582	0.501	19.2572	0.269786			127.417	0.676	2.71	36.3434	22.8602	6.95553	0.244104	73.1392		1.85456	1.34584	0.0408368
278B	278	Western Head	24.4986	-81.819	11.738	0.087	0.068	0.019	0.059	8.89737	0.146	8.75137	0.204793	0.001		80.7667	0.595	2.2	36.4625	23.9651	6.81805	0.267801	38.046	-147.804	0.504925	3.91561	0.0623527
278S	278	Western Head	24.4986	-81.819	11.738	0.041	0.014	0.027	0.107	11.1518	0.148	11.0038	0.292724	-0.001	0.221525	81.5833	0.581	2.6	36.4688	24.1652	6.79429	0.267801	38.046	-147.804	0.504925	3.91561	0.0623527
280B	280	Eastern Dry Rocks	24.4536	-81.8436	27.954	0.153	0.119	0.034	0.064	8.05384	0.217	7.83684	0.195479			79.6083	0.065	1.08	36.4462	23.8483	6.83249	0.128882	61.3935	32.8135	1.26689	0.294894	0.204556
280S	280	Eastern Dry Rocks	24.4536	-81.8436	27.954	0.135	0.098	0.037	0.095	11.1458	0.23	10.9158	0.181306	0.007	0.377895	84.0833	0.068	0.88	36.4097	24.3759	6.77198	0.128882	61.3935	32.8135	1.26689	0.294894	0.204556
295S	295	Bullfrog Banks	24.8516	-81.3512	2.161	1.047	0.889	0.158	2.207	28.5597	3.254	25.3057	0.597243	0.056	2.30646	176.333	0.836	9.75	36.269	21.9633	7.07006	1.04363	47.7557	58.03	5.44114	0.256256	-0.00296741
301S	301	Cutoe Key	24.7726	-81.3966	2.505	0.241	0.206	0.035	0.2619	20.3706	0.5029	19.8677	0.284571	0.006	0.182432	174.083	0.51	1.06	36.3664	22.492	6.99996	0.327722	71.4883	83.7054	1.76487	1.01152	-0.00207715
305S	305	Cudjoe Key	24.7685	-81.555	2.648	0.051		0.052	0.3539	18.8186	0.4049	18.4137	0.340354		0.534265	154.25	0.285	4.86	36.2506	22.5426	6.99838	0.688176	55.2178		1.18807	0.702073	-0.000982956
307S	307	Tarpon Belly Keys	24.725	-81.5205	3.369	0.081	0.054	0.027	0.4219	23.0002	0.5029	22.4973	0.311267		0.338802	185.5	1.006	4.06	36.8285	21.881	7.05742	0.653481	73.7941		1.61351	1.99527	0.0084234
315S	315	Calda Channel	24.6333	-81.8283	1.895	0.07	0.038	0.032	0.17	11.2451	0.24	11.0051	0.261	0.018	0.521234	140.917	1.944	0.81	35.1664	23.8698	6.88032	0.439996	43.0273	13.3156	0.91832	8.07923	-0.000824589
316S	316	Man of War Harbor	24.5858	-81.8024	4.75	0.803	0.682	0.121	0.304	14.6053	1.107	13.4983	0.261	0.013	0.364864	178.667	2.46	2.92	35.2492	25.3982	6.69894	0.459621	55.8847	85.0408	4.23575	2.21652	0.00845352
330B	330	New Ground	24.6653	-82.374	8.843	0.033	0.022	0.011	0.21	7.16183	0.243	6.91883	0.166035	0.005		89.4167		0.75	36.616	24.6955	6.72705	0.0855914	55.6626	10.253	0.801639		0.473631
330S	330	New Ground	24.6653	-82.374	8.843	0.038	0.022	0.016	0.116	10.6931	0.154	10.5391	0.191851	0.015	0.351833	105.667		0.53	36.5033	25.806	6.6058	0.0855914	55.6626	10.253	0.801639		0.473631
333B	333	Half Moon Shoal	24.5772	-82.4913	18.934	0.015	0.004	0.011	0.184	7.71746	0.199	7.51846	0.111033	0.003		83.75		0.56	36.4885	24.9451	6.70332	0.0813424	56.7488	51.931	3.13535		0.171332
333S	333	Half Moon Shoal	24.5772	-82.4913	18.934	0.036	0.021	0.015	0.432	8.47064	0.468	8.00264	0.149067	0.009	0.195463	90.4167		0.28	36.5032	25.4663	6.64375	0.0813424	56.7488	51.931	3.13535		0.171332
335B	335	Sta 335	24.4608	-82.3832	17.593	0.039	0.029	0.01	0.146	6.87167	0.185	6.68667	0.130879	0.005		85.0833		0.23	36.4355	24.8063	6.72124	0.0742549	77.8637	88.4824	4.74272		0.110142
335S	335	Sta 335	24.4608	-82.3832	17.593	0.057	0.042	0.015	0.386	7.27296	0.443	6.82996	0.0932824	0.005	0.195463	86.25		0.05	36.4232	25.0976	6.68844	0.0742549	77.8637	88.4824	4.74272		0.110142
501S	501	Calusa Park Marina	25.1105	-80.4342	2.113	0.50981	0.40474	0.10507	0.482	11.4129	0.99181	10.4211	0.269169	0.14574	0.416987	222.333	0.939		33.9538	24.2902	6.87798	0.506115	42.3443	6.79631	3.67982	0.944326	1.32499
509S	509	Key West Ocean- Intl airport	24.5523	-81.7494	1.457	0.753	0.613	0.14	0.62	17.0939	1.373	15.7209	0.338	0.022	0.91216	171.083	2.428	6.85	35.1745	25.101	6.73574	1.0291	50.5067	62.3263	4.05674	1.76386	-0.00198789
