# Supplementary material
Source: Preprints.org preprint supplement (doi:10.20944/preprints202104.0449.v2)
Supplement: Supplementary file 4 [file Table S2.docx]

| Table S2: Detrended Correspondence Analysis (DCA) of 16 rRNA gene dataset with environmental parameters.  DCA1 DCA2 r2 Pr Significance |
| --- |
| Latitude 0.72802  0.68556 0.1110 0.565435 |
| LONDEC  0.40149  0.91586 0.3116 0.144855 |
| NOX     0.33371 -0.94268 0.2729 0.178821 |
| NO3     0.32933 -0.94421 0.2816 0.169830 |
| NO2     0.36519 -0.93093 0.2132 0.283716 |
| NH4    -0.04412 -0.99903 0.0981 0.604396 |
| TN      0.15685 -0.98762 0.3098 0.148851 |
| DIN     0.13993 -0.99016 0.1618 0.422577 |
| TON     0.15893 -0.98729 0.3252 0.134865 |
| TP     -0.09116 -0.99584 0.3381 0.098901 |
| SRP     0.60797  0.79396 0.0873 0.658342 |
| CHLA   -0.21371 -0.97690 0.1563 0.446553 |
| **TOC     0.49045 -0.87147 0.7774 0.001998** **Medium** |
| SiO2    0.95937 -0.28214 0.3119 0.168831 |
| TURB   -0.03857 -0.99926 0.2207 0.258741 |
| SAL    -0.26217  0.96502 0.3414 0.129870 |
| **TEMP    0.20170  0.97945 0.5459 0.018981 Moderate** |
| **DO     -0.14473 -0.98947 0.6195 0.008991 Medium** |
| Kd      0.26936 -0.96304 0.3187 0.136863 |
| TN.TP   0.65233  0.75793 0.1532 0.370629 |
| N.P     0.94429 -0.32910 0.3388 0.114885 |
| DIN.TP  0.63676 -0.77106 0.1773 0.346653 |
| Si.DIN  0.52856  0.84890 0.0436 0.786214 |
| DSIGT  -0.99375 -0.11162 0.1873 0.347652 |
| Depth  -0.88514  0.46532 0.4097 0.051948 |
